# Supplementary material
Source: publisher figshare collection journal article supplement (https://acs.figshare.com/ndownloader/files/4504726)
Supplement: Supplementary file 1 [file 4504726]

## Supporting Information

### Identification of Death-Associated Protein Kinase Inhibitors Using Structure-Based Virtual Screening

Masako Okamoto, Kiyoshi Takayama, Tomoko Shimizu, Kazuhiro Ishida, Osamu Takahashi, Toshio Furuya

#### Contents:

Comparison of enrichment curves for *CONSENSUS-DOCK* versus DOCK4 only.

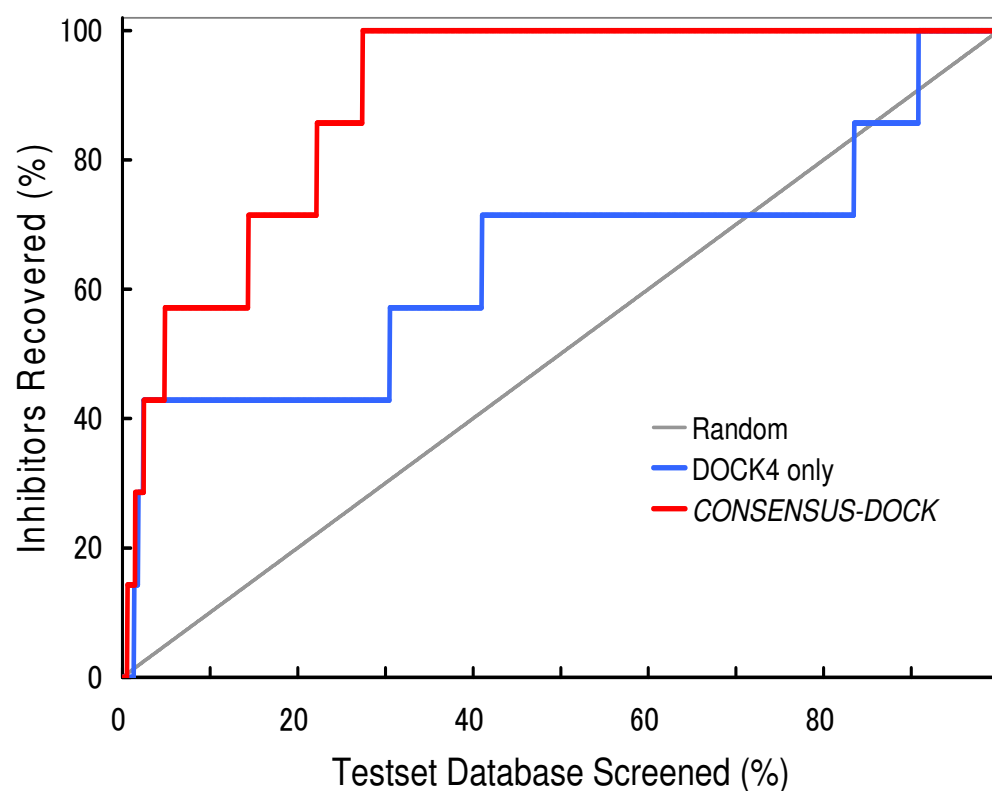

Comparison of enrichment curves for *CONSENSUS-DOCK* versus DOCK4 only. The 'MODEL' structure (in Fig. 2) was used in both calculations. These results obviously indicate that *CONSENSUS-DOCK* has an advantage in the enrichment of inhibitors to DOCK4 only in the Testset Database Screening.
